# Supplementary material for: Site-specific N -glycoproteomic analysis of four M2 macrophage subtypes derived from human THP-1 cells
Source: Royal Society of Chemistry journal article supplement (doi:10.1039/d5cc06865g), 2026-01-01
Supplement: d5cc06865g1.pdf [file d5cc06865g1.pdf]

**Supplementary data for site-specific *N*-glycoproteomic analysis of  
four M2 macrophage subtypes derived from human THP-1 cells**

Pengfei Li<sup>ab</sup>, Chen Ma<sup>a</sup>, Lin Chen<sup>a</sup>, Zexuan Chen<sup>a</sup>, Shanshan You<sup>ac</sup>, Jun Li<sup>a</sup>, Shisheng

Sun<sup>\*a</sup>

<sup>\*</sup>College of Life Sciences, Northwest University, 229 North Taibai Road, Life Science

Building, Room 221, Xi'an, Shaanxi Province 710069, P. R. China

Email: [suns@nwu.edu.cn](mailto:suns@nwu.edu.cn)

Phone: 86-29-88302411

## **Experimental section**

### **Sample Source**

Human monocytic cell line THP-1 was obtained from the Cell Bank of Chinese Academy of Sciences (Shanghai, China). THP-1 monocytes were cultured in RPMI 1640 medium (VivaCell, Shanghai, China), supplemented with 10% fetal bovine serum (Biolnd, Israel; VivaCell, Shanghai, China) and 1% penicillin–streptomycin (Solarbio, China) at 37 °C and 5% CO<sub>2</sub>. The peptide samples of THP-1 cells-derived M2a, M2b, M2c, and M2d macrophage were obtained from our previous experiments, and the successful polarization of four M2 subtypes had been confirmed, as described previously <sup>10</sup>.

### **Cell lysis and protein extraction**

The denaturing buffer that contained 8 M urea (Merck, Darmstadt, Germany) and 1 M ammonium bicarbonate (Merck, Darmstadt, Germany) was added to cells for cell lysis. The denatured proteins were reduced by 5 mmol/L dithiothreitol at 37 °C for 1 h, and then alkylated by 15 mmol/L iodoacetamide (Merck, Darmstadt, Germany) in the dark for 30 min at room temperature. The remaining iodoacetamide was quenched by adding 2.5 mmol/L dithiothreitol and incubated for 10 min at room temperature. The protein solutions were first diluted two-fold with deionized water and then the proteins were digested by sequencing grade trypsin (Promega, Madison, WI, USA) with the ratio of 1:100 (trypsin to total protein, w/w) at 37 °C for 2 h. The solutions were further diluted four-fold with deionized water, and additional trypsin (trypsin to total protein, 1:100, w/w) was added with overnight incubation at 37 °C overnight. The sample solutions were acidified to pH<2 with trifluoroacetic acid (TFA), centrifuged at 15 000g for 15 min, and then the digested peptides in the supernatant were purified using a C18 column. The peptides were eluted from the column by 60% acetonitrile (ACN)/0.1% TFA. ACN and TFA were purchased from Thermo Fisher Scientific (Waltham, MA, USA).

### **Enrichment of N-Linked Intact Glycopeptides**

The intact glycopeptides were enriched using hydrophilic interaction chromatography (HILIC) micro-column (Cat: VH950010-0, Agela Technologies, China), and the method has been described in detail in previous publications <sup>11</sup>. Briefly, peptides were diluted to final solvent composition of 80% ACN/1% TFA for HILIC enrichment. Before sample loading, the columns were washed twice each by 0.1% TFA and 80% ACN/0.2% TFA. The columns were washed three times with 80% ACN/0.2% TFA after samples were loaded. Finally, the glycopeptides were eluted in 0.1% formic acid (FA) solution (Thermo Fisher Scientific, USA). To reduce the biological variance, the samples from three biological replicates were pooled into one sample for further analyses.

### **Mass Spectrometry Analysis**

Intact glycopeptides in each samples underwent three LC-MS/MS runs on an Orbitrap Fusion Lumos mass spectrometer (Thermo Fisher Scientific, Germany). About 1 µg

intact glycopeptides were separated by an Easy-nLC 1200 system with a 75  $\mu\text{m} \times 50$  cm Acclaim PepMap-100 C18 separating column protected by a 75  $\mu\text{m} \times 2$  cm guarding column. Mobile phase flow rate was 200 nL/min and consisted of 0.1% FA in water (A) and 80% ACN/0.1% FA (B). The gradient profile for LC separation was set as follows: 3–7% B for 3 min, 7–40% B for 200 min, 40–68% B for 20 min, 68–99% B for 4 min and 99% B for 13 min. The spray voltage (+) was set at 2,400 V. Orbitrap spectra with automatic gain control (AGC) of  $4 \times 10^5$  were collected from 375–2,000  $m/z$  at a resolution of 120,000 followed by oxonium ions (138.055  $m/z$  and 204.087  $m/z$ )-dependent HCD (33% collision energy) triggered 20% collision energy HCD MS/MS at a resolution of 30,000 using an isolation width of 2  $m/z$ . Charge states from 2 to 7 were selected for MS/MS acquisition. Unassigned and singly charged ions were rejected. A dynamic exclusion time of 20 s was set for each precursor ion after being selected once. A representative total ion chromatogram (TIC) was provided to demonstrate the quality of the LC separation, the TIC showed well-dispersed peaks characteristic with uniform line shapes and intensities (Fig. S4).

### **Intact Glycopeptide Identification**

As previously described<sup>5</sup>, intact glycopeptides analyses were performed using the built-in glycan branch structure database from StrucGP and the human protein databases (UP000005640). The protein enzymatic digestion was set as trypsin with a maximum of two missed cleavage sites and the potential glycosite-containing peptides were screened with the N-X-S/T motif (X is any amino acid except Proline). The carbamidomethylation (C, +57.02 Da) was set as a fixed modification, and oxidation (M, +15.9949 Da) as a dynamic modification. The mass tolerances for MS1 and MS2 were set at 10 and 20 ppm, respectively. For the Y ions determination, an optional mass shift of  $\pm 1$  or  $\pm 2$  Da was allowed in addition to the 20-ppm mass tolerance in MS2. Finally, both peptide and glycan portions required <1% false discovery rates (FDR) for the intact glycopeptide identification.

### **Analysis and Visualization of N-Glycan Structures**

The average number of GPSMs for each N-glycan structure was calculated from the three replicates and then normalized against the total number of GPSMs in each sample. GlycoVisual tool (<https://zenodo.org>) was used to visualize the results of StrucGP by the corresponding MS/MS spectra to demonstrate the principle of glycan type and structure determination in intact glycopeptide analysis<sup>5</sup>.

### **Bioinformatics Analysis**

These pathway enrichments, including Gene ontology (GO), Kyoto Encyclopedia of Genes and Genomes (KEGG), reactome pathway and protein–protein interaction (PPI) analyses (interaction score > 0.4) were performed to search for the associated important pathway information and key glycoproteins using STRING database (<https://string-db.org>)<sup>12</sup>. Whole human genome as background, and  $p < 0.05$ . The disease correlation analysis was performed by STRING database and ClueGO of Cytoscape software<sup>13</sup>

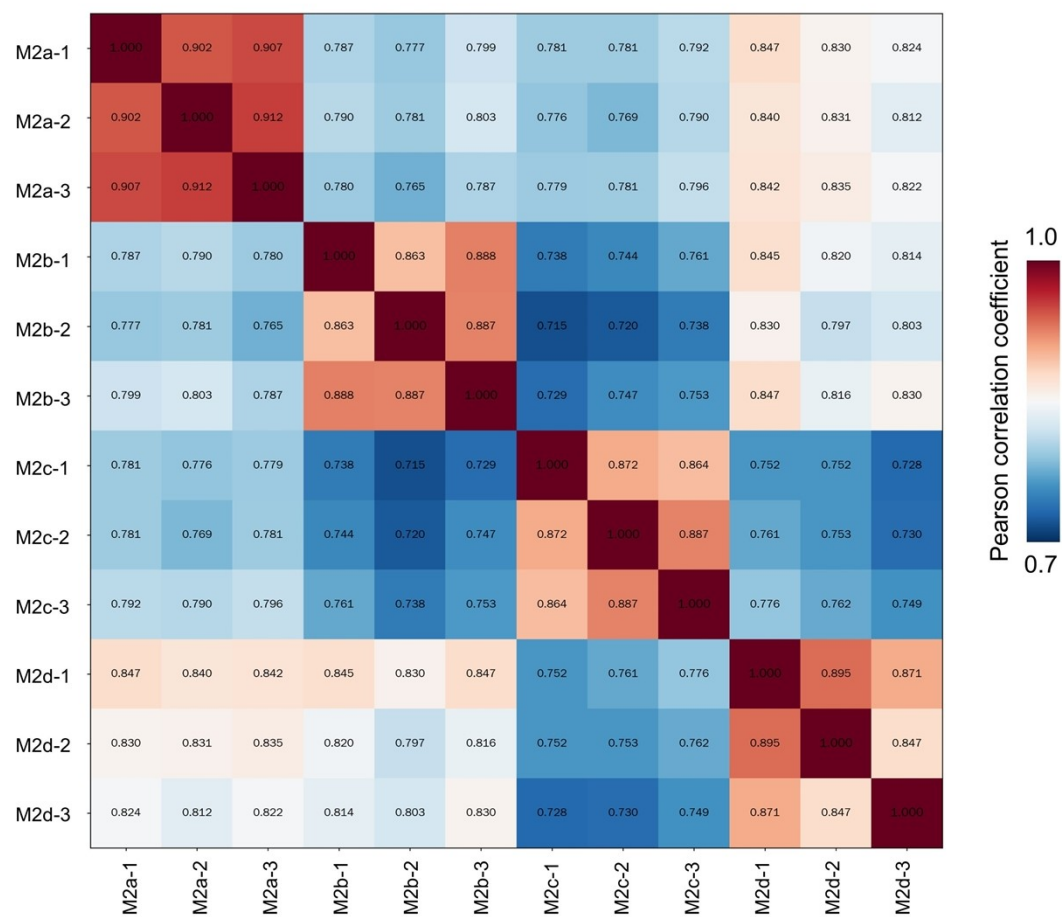

**Fig. S1.** Repeatability analysis was assessed through Pearson correlation coefficient. All aforementioned correlations were statistically significant ( $p < 0.001$ ).

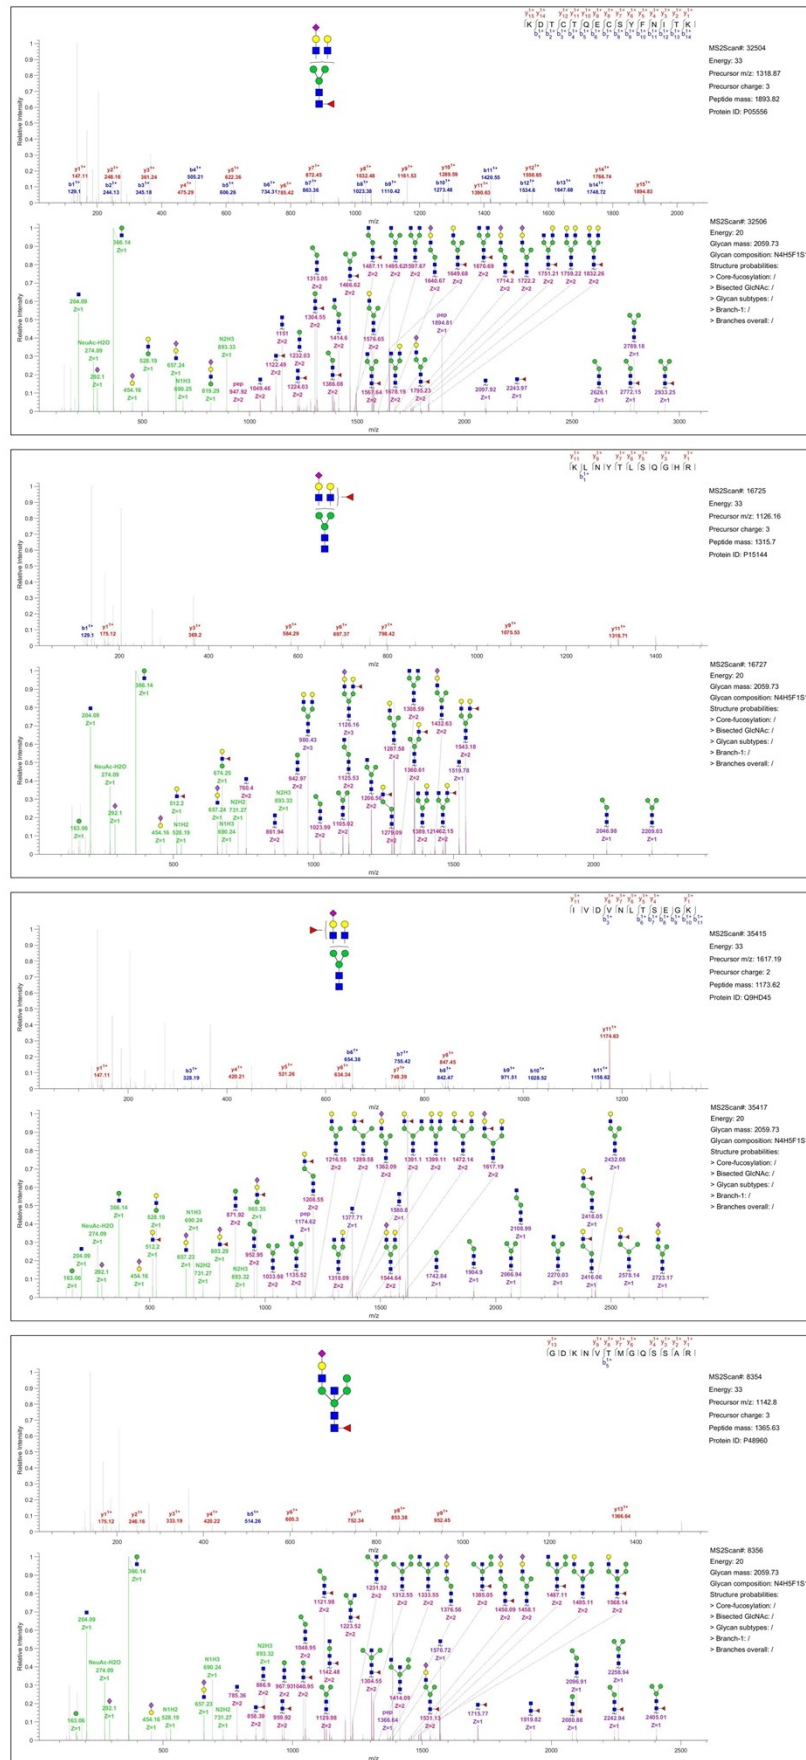

**Fig. S2.** Representative MS/MS spectra of four different isomers of N4H5F1S1.

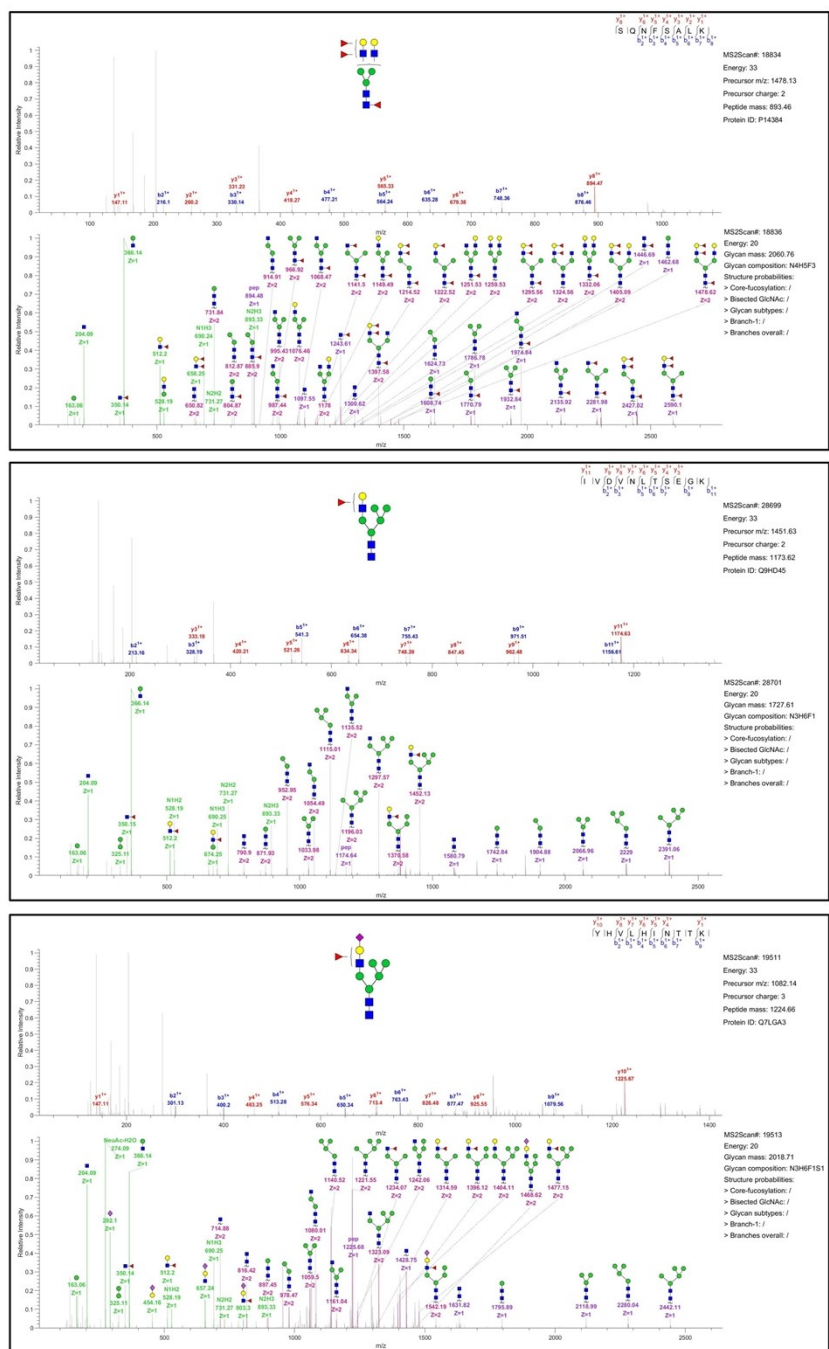

**Fig. S3.** Representative MS/MS spectra of Lewis structures.

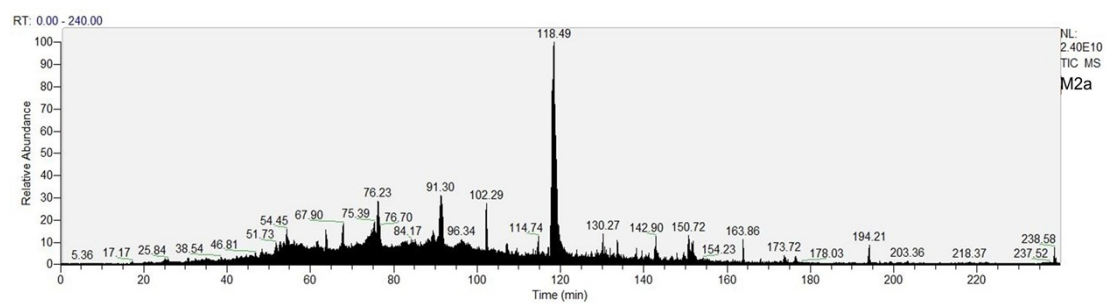

**Fig. S4.** TIC of M2a macrophage-derived glycopeptide samples.
